# Supplementary material
Source: HighWire-hosted journal article supplement (https://www.eneuro.org/content/5/6/ENEURO.0465-18.2018)
Supplement: inline-supplementary-material-1 [file inline-supplementary-material-1.docx]

**Extended Data**

| **Figure 5-1. p-values for (+)-menthol and (−)-menthol comparison between α4[L9’X]β2[wt] mutants** | |
| --- | --- |
| **Receptor** | **p-value (from paired, two-tailed t-test)** |
| (α4[L9'T])2(β2[wt])3 | 2.21 x 10-4 |
| (α4[L9'A])2(β2[wt])3 | 3.79 x 10-7 |
| (α4[L9'S])2(β2[wt])3 | 8.07 x 10-5 |
| (α4[L9'Q])2(β2[wt])3 | 1.29 x 10-3 |
| (α4[L9'C])2(β2[wt])3 | 2.19 x 10-3 |
| (α4[L9'F])2(β2[wt])3 | 0.793 |
| (α4[L9'I])2(β2[wt])3 | 7.14 x 10-4 |
| (α4[wt])2(β2[wt])3 | 0.957 |
| (α4[L9'M])2(β2[wt])3 | 5.70 x 10-13 |
| (α4[L9'W])2(β2[wt])3 | 0.411 |
| (α4[wt])3(β2[wt])2 | 1.00 x 10-15 |
