# Supplementary material
Source: HighWire-hosted journal article supplement (https://www.eneuro.org/content/5/6/ENEURO.0465-18.2018)
Supplement: inline-supplementary-material-3 [file inline-supplementary-material-3.docx]

| **Figure 7-2. R2 Values for correlation of IC30 for (+)-menthol vs. amino acid indices** | |
| --- | --- |
| **Index** | **R2** |
| End-to-End length | 0.74 |
| Volume | 0.72 |
| MEEJ810102 | 0.61 |
| COWR900101 | 0.49 |
| PONP800108 | 0.27 |
| LIFS790102 | 0.15 |
| FAUJ880110 | 0.23 |
| JACR890101 | 0.18 |
| WARP78010 | 0.017 |
| ZIMJ680103 | 0.00019 |
